# Supplementary material
Source: publisher figshare collection journal article supplement (https://gsapubs.figshare.com/ndownloader/files/24850535)
Supplement: Supplementary file 1 [file 24850535]

## Sheet: Sheet1
Supplemental Material for Ashworth, A.C., Thackray, G.D., and Gavin, D.G., 2020, Climate of the Last Glacial Maximum on the western Olympic Peninsula
based on insect paleoecology, palynology, and glacial geology, in Waitt, R.B., Thackray, G.D., and Gillespie, A.R., eds., Untangling the Quaternary Period:
A Legacy of Stephen C. Porter: Geological Society of America Special Paper 548, https://doi.org/10.1130/2020.2548(06).
S2C. Kalaloch K2
Taxa	H	P	LE	RE	Other	MNI
Carabidae
Trechus chalybeus		1				1
Trechus sp.			1	1		1
Carabidae gen. sp.				1	1fE	1
Helophorus auricollis			5	8		8
Helophorus sp.		4				4
Staphylinidae
Arpedium cribratum		3				3
Arpedium sp.			4	7		7
Tachyporinae gen. sp.			1	1	1S	1
Aleocharinae gen. sp.		6	1	1		6
Stenus sp.			2			2
Staphylininae gen. sp.			3	1		4
Staphylinidae gen. sp.			1	2		3
Elateridae
Hypnoidus sp.			1	1		1
Chrysomelidae
Neocrepidodera robusta	1	4	7	8		8
cf. Chrysomelidae gen. sp.		3		1		4
Brentidae
Apion spp.			6	10		10
Curculionidae gen. sp.
Curculionidae
Erirhinus aethiops	2			2		2
Curculionidae gen. sp.					1fE	1
Trichoptera	1					1
Total Individuals						68
H=head(s); P=pronotum(a); LE= left elytron (a); RE=right elytron (a);S=sternite (s);
E=elyton indeterminate; f=fragment; MNI=minimum number of individuals
